# Supplementary material for: A family of mixed-ligand oxidovanadium(v) complexes with aroylhydrazone ligands: a combined experimental and computational study on the electronic effects of para substituents of hydrazone ligands on the electronic properties, DNA binding and nuclease activities
Source: Royal Society of Chemistry journal article supplement (doi:10.1039/c5ra17844d), 2015-01-01
Supplement: c5ra17844d1.pdf [file c5ra17844d1.pdf]

**RA-ART-09-2015-017844 (R)**

**A family of mixed-ligand oxidovanadium(V) complexes with aroylhydrazone ligands: a combined experimental and computational study on the electronic effects of *para* substituents of hydrazone ligands on the electronic properties,**

**5 DNA binding and nuclease activities**

Debashis Patra<sup>a</sup>, Nirmalendu Biswas<sup>a</sup>, Bhavini Kumari<sup>b</sup>, Prolay Das<sup>b</sup>, Nayim Sepay<sup>c</sup>, Shamba Chatterjee<sup>d</sup>, Michael G. B. Drew<sup>c</sup> and Tapas Ghosh<sup>a,\*</sup>

<sup>a</sup>Post Graduate Department of Chemistry, Ramakrishna Mission Vivekananda Centenary College, Rahara, Kolkata-700118, India. E-mail: [ictg\\_64@yahoo.co.in](mailto:ictg_64@yahoo.co.in)

<sup>b</sup>Department of Chemistry, Indian Institute of Technology Patna, India.

10 <sup>c</sup>Department of Chemistry, Jadavpur University, Kolkata-700032, India.

<sup>d</sup>Department of Organic Chemistry, Indian Association for the Cultivation of Science, Jadavpur, Kolkata-700032, India.

<sup>e</sup>Department of Chemistry, The University of Reading, P. O. Box 224, Whiteknights, Reading RG6 6AD, UK.

**SUPPLEMENTARY DATA**

15 Table of content

Table S1 Crystal data and structure determination summary of  $H_3L^3$ , **1**, **2**, **3** and **4**.

Table S2 Selected bond lengths (Å) of the  $H_3L^3$  ligand in molecules **A** and **B**.

Table S3 Hydrogen bond parameters in the structure of  $H_3L^3$  ligand.

Table S4 Hydrogen bond parameters [bond lengths (Å) and angles (°)] of the complexes **1-4**.

20 Table S5 Selected bond lengths (Å) and angles (°) in complexes **1-4** obtained by DFT method.

Table S6 Vertical excitation energies ( $E_{cal}$ ), oscillator strengths ( $f_{cal}$ ), and type of excitations of the lowest three excited singlets obtained from TD-DFT calculations of **1-4**.

Table S7 Extent of DNA SC pUC19 (500 ng) cleavage by 0.25 mM **1-4** complexes.

25 Table S8 Extent of DNA SC pUC19 (500 ng) cleavage by ligands  $H_3L^{1-4}$ .

Table S9 Different type of interactions between the CT-DNA and the each of the complexes obtained from molecular docking study.

Fig. S1:  $^{51}\text{V}$  NMR spectra of complexes **1-4** in  $\text{CDCl}_3$  solution.

Fig. S2: Overlay of the electronic spectra of **1-4** complexes in  $\text{CH}_2\text{Cl}_2$  solution.

Fig. S3: Perspective view of the components of the crystallographic asymmetric unit of  $\text{H}_3\text{L}^3$ .

Fig. S4: Cyclic voltammogram of the complexes **1-4** in  $\text{CH}_2\text{Cl}_2$  solution.

5 Fig. S5: Cyclic voltammogram of **1-4** complexes in  $\text{CH}_2\text{Cl}_2$  solution at different scan rate. Concentration of the complexes:  $\sim 1 \times 10^{-3} \text{ mol dm}^{-3}$ ; supporting electrolyte: tetrabutylammonium perchlorate.

Fig. S6: Plot of  $\lambda_{\text{max}}$  versus  $E_{1/2}$  for the complexes **1-4**.

Fig. S7: Absorption spectra of the complexes **1-4** in the presence of increasing amounts of CT DNA. A fixed concentration of complex ( $10^{-5} \text{ M}$ ) was treated with increasing amounts of DNA over a range of (1-  
10  $10) \times 10^{-6} \text{ M}$ . (**inset:** The linear fit of  $[\text{DNA}]/(\epsilon_a - \epsilon_f)$  versus  $[\text{DNA}]$ ).

Fig. S8: Fluorescence spectra of (a) EB +  $10^{-4} \text{ M}$  DNA control and (b)-(k) EB + DNA +  $(1-10) \times 10^{-5} \text{ M}$  ligands  $\text{H}_3\text{L}^1$ ,  $\text{H}_3\text{L}^2$ ,  $\text{H}_3\text{L}^3$  and  $\text{H}_3\text{L}^4$ . The arrow shows that the intensity decreases with increasing concentration of ligands  $\text{H}_3\text{L}^1$ ,  $\text{H}_3\text{L}^2$ ,  $\text{H}_3\text{L}^3$  and  $\text{H}_3\text{L}^4$ . (Inset: Stern-Volmer plot for the quenching of fluorescence of the ethidium bromide (EB) DNA complex caused by ligands  $\text{H}_3\text{L}^1$ ,  $\text{H}_3\text{L}^2$ ,  $\text{H}_3\text{L}^3$   
15 and  $\text{H}_3\text{L}^4$  respectively).

Fig. S9: Nuclease activity of complexes **1-4**:

pUC19 incubated with 0.25 mM of complex **1**, **2**, **3** and **4**. Lane 1 contains pUC19 as control and lane 2, 3, 4 and 5 contain pUC19 incubated with complex **1**, **2**, **3** and **4** respectively. The upper bands correspond to the OC form and the lower bands for SC form of the Plasmid.

20 Fig. S10: Nuclease activity of ligands  $\text{H}_3\text{L}^{1-4}$ :

pUC19 incubated with 0.5 mM of ligand  $\text{H}_3\text{L}^1$ ,  $\text{H}_3\text{L}^2$ ,  $\text{H}_3\text{L}^3$  and  $\text{H}_3\text{L}^4$ . Lane 1 contains pUC19 as control and lane 2, 3, 4 and 5 contain pUC19 incubated with ligand  $\text{H}_3\text{L}^1$ ,  $\text{H}_3\text{L}^2$ ,  $\text{H}_3\text{L}^3$  and  $\text{H}_3\text{L}^4$  respectively. The upper bands correspond to the OC form, the middle band for LC and the lower bands for SC form of the Plasmid.

25 Fig. S11: Docked pose of ligands  $\text{H}_3\text{L}^1$  (top left),  $\text{H}_3\text{L}^2$  (top right),  $\text{H}_3\text{L}^3$  (bottom left) and  $\text{H}_3\text{L}^4$  (bottom right) showing interaction with DNA base pairs.

**Table S1:** Crystal data and structure determination summary of  $\text{H}_3\text{L}^3$ , **1**, **2**, **3** and **4**

|                                                      | $\text{H}_3\text{L}^3$                                 | <b>1</b>                                                 | <b>2</b>                                                 | <b>3</b>                                                 | <b>4</b>                                                   |
|------------------------------------------------------|--------------------------------------------------------|----------------------------------------------------------|----------------------------------------------------------|----------------------------------------------------------|------------------------------------------------------------|
| Empirical formula                                    | $\text{C}_{17.5}\text{H}_{19}\text{N}_2\text{O}_{4.5}$ | $\text{C}_{24}\text{H}_{18}\text{N}_3\text{O}_5\text{V}$ | $\text{C}_{25}\text{H}_{20}\text{N}_3\text{O}_5\text{V}$ | $\text{C}_{25}\text{H}_{20}\text{N}_3\text{O}_6\text{V}$ | $\text{C}_{24}\text{H}_{17}\text{ClN}_3\text{O}_5\text{V}$ |
| Formula weight                                       | 329.35                                                 | 479.35                                                   | 493.38                                                   | 509.38                                                   | 513.80                                                     |
| Crystal colour                                       | white                                                  | black                                                    | black                                                    | black                                                    | black                                                      |
| Temperature (K)                                      | 150(2)                                                 | 150(2)                                                   | 150(2)                                                   | 293(2)                                                   | 150(2)                                                     |
| Crystal system                                       | triclinic                                              | monoclinic                                               | triclinic                                                | monoclinic                                               | triclinic                                                  |
| Space group                                          | <i>P</i> -1                                            | <i>P</i> 2 <sub>1</sub> / <i>c</i>                       | <i>P</i> -1                                              | <i>P</i> 2 <sub>1</sub> / <i>c</i>                       | <i>P</i> -1                                                |
| <i>a</i> /Å                                          | 12.1814(14)                                            | 13.5975(17)                                              | 8.7713(6)                                                | 7.668(3)                                                 | 8.3143(6)                                                  |
| <i>b</i> /Å                                          | 12.8382(18)                                            | 11.4633(19)                                              | 10.1477(8)                                               | 14.153(6)                                                | 11.3015(7)                                                 |
| <i>c</i> /Å                                          | 13.3641(15)                                            | 14.148(2)                                                | 13.3468(9)                                               | 21.853(10)                                               | 12.1012(8)                                                 |
| $\alpha^\circ$                                       | 112.58(12)                                             | 90                                                       | 74.541(7)                                                | 90                                                       | 72.559(6)                                                  |
| $\beta^\circ$                                        | 96.537(10)                                             | 105.616(16)                                              | 84.262(6)                                                | 96.860(6)                                                | 84.859(6)                                                  |
| $\gamma^\circ$                                       | 117.044(13)                                            | 90                                                       | 73.896(7)                                                | 90                                                       | 76.042(6)                                                  |
| <i>V</i> /Å <sup>3</sup>                             | 1609.5(3)                                              | 2123.9(6)                                                | 1099.63(14)                                              | 2354.5(18)                                               | 1052.60(12)                                                |
| <i>Z</i>                                             | 4                                                      | 4                                                        | 2                                                        | 4                                                        | 2                                                          |
| <i>D</i> <sub>x</sub> (g cm <sup>-3</sup> )          | 1.359                                                  | 1.499                                                    | 1.490                                                    | 1.437                                                    | 1.621                                                      |
| $\mu$ (mm <sup>-1</sup> )                            | 0.099                                                  | 0.510                                                    | 0.495                                                    | 0.468                                                    | 0.643                                                      |
| <i>F</i> (000)                                       | 696                                                    | 984                                                      | 508                                                      | 1048                                                     | 524                                                        |
| Data/restraints/parameters                           | 8976/0/441                                             | 5923/1/300                                               | 6167/0/310                                               | 4134/0/319                                               | 5889/0/309                                                 |
| Goodness-of-fit on <i>F</i> <sup>2</sup>             | 1.038                                                  | 0.939                                                    | 1.003                                                    | 0.964                                                    | 0.810                                                      |
| R indices, [I > 2σ(I)] R1, wR2                       | 0.0940, 0.1706                                         | 0.0706, 0.1202                                           | 0.0572, 0.1095                                           | 0.0662, 0.1503                                           | 0.0506, 0.1275                                             |
| R indices(all data) R1, wR2                          | 0.1663, 0.2107                                         | 0.1775, 0.1676                                           | 0.0871, 0.1239                                           | 0.1241, 0.1767                                           | 0.0751, 0.1513                                             |
| $\Delta\rho_{\text{max}}$ , min (e Å <sup>-3</sup> ) | 0.403, -0.353                                          | 0.293, -0.339                                            | 0.402, -0.418                                            | 0.342, -0.595                                            | 0.486, -0.586                                              |

**5 Table S2:** Selected bond lengths (Å) of the  $\text{H}_3\text{L}^3$  ligand in molecules **A** and **B**

|           | <b>A</b> | <b>B</b> |
|-----------|----------|----------|
| C(7)-N(1) | 1.292(4) | 1.284(4) |
| N(1)-N(2) | 1.370(3) | 1.370(3) |
| C(8)-N(2) | 1.351(3) | 1.343(4) |
| C(8)-O(3) | 1.243(4) | 1.249(3) |

**Table S3:** Hydrogen bond parameters in the structure of H<sub>3</sub>L<sup>3</sup> ligand

| <b>D-H...A</b>                      | <b>d(D-H)</b> | <b>d(H...A)</b> | <b>d(D...A)</b> | <b>&lt;(DHA)</b> |
|-------------------------------------|---------------|-----------------|-----------------|------------------|
| N(2A)-H(2A)...O(5A)                 | 0.86          | 1.92            | 2.600(3)        | 135.2            |
| O(2A)-H(2A)...N(1A)                 | 0.82          | 1.82            | 2.533(3)        | 144.9            |
| O(5B)-H(5B)...O(3A) <sup>(ii)</sup> | 0.82          | 1.78            | 2.597(3)        | 176.4            |
| N(2B)-H(2B)...O(5B)                 | 0.86          | 1.91            | 2.588(3)        | 135.3            |
| O(2B)-H(2B)...N(1B)                 | 0.82          | 1.82            | 2.533(3)        | 144.3            |
| O(5A)-H(5A)...O(3B) <sup>(i)</sup>  | 0.82          | 1.80            | 2.597(3)        | 163.5            |

Symmetry elements: (i) 1+x,-1+y,z; (ii) -1+x,y,z

**Table S4:** Hydrogen bond parameters [bond lengths (Å) and angles (°)] of the complexes **1-4**

| <b>Complex</b> | <b>D-H...A</b>   | <b>d(D-H)</b> | <b>d(H...A)</b> | <b>d(D...A)</b> | <b>&lt;(DHA)</b> |
|----------------|------------------|---------------|-----------------|-----------------|------------------|
| <b>1</b>       | O(5)-H(5)...N(2) | 0.82          | 1.88            | 2.599 (4)       | 145.6            |
| <b>2</b>       | O(5)-H(5)...N(2) | 0.82          | 1.87            | 2.585 (2)       | 145.3            |
| <b>3</b>       | O(5)-H(5)...N(2) | 0.82          | 1.91            | 2.633 (3)       | 145.9            |
| <b>4</b>       | O(5)-H(5)...N(2) | 0.82          | 1.87            | 2.598 (2)       | 145.5            |

5

10

15

20

**Table S5:** Selected bond lengths (Å) and angles (°) in complexes **1-4** obtained by DFT method

|    |         | <b>6-311++G**</b> |          |          |          | <b>6-31G</b> |          |          |          |
|----|---------|-------------------|----------|----------|----------|--------------|----------|----------|----------|
|    |         | <b>1</b>          | <b>2</b> | <b>3</b> | <b>4</b> | <b>1</b>     | <b>2</b> | <b>3</b> | <b>4</b> |
| 10 | V-O1    | 1.571             | 1.572    | 1.572    | 1.571    | 1.593        | 1.593    | 1.594    | 1.593    |
|    | V-O2    | 1.842             | 1.840    | 1.834    | 1.846    | 1.832        | 1.830    | 1.826    | 1.837    |
|    | V-O3    | 1.945             | 1.947    | 1.951    | 1.944    | 1.929        | 1.931    | 1.933    | 1.927    |
|    | V-O4    | 1.840             | 1.841    | 1.842    | 1.838    | 1.825        | 1.826    | 1.826    | 1.822    |
| 15 | V-N1    | 2.123             | 2.124    | 2.129    | 2.127    | 2.126        | 2.126    | 2.131    | 2.130    |
|    | V-N3    | 2.521             | 2.522    | 2.521    | 2.518    | 2.543        | 2.544    | 2.542    | 2.536    |
| 20 | O1-V-O2 | 101.36            | 101.39   | 101.58   | 101.23   | 100.82       | 100.82   | 100.95   | 100.59   |
|    | O1-V-O3 | 101.72            | 101.77   | 101.69   | 101.81   | 101.26       | 101.13   | 101.01   | 101.21   |
|    | O1-V-O4 | 103.67            | 103.67   | 103.64   | 103.66   | 103.80       | 103.86   | 103.86   | 103.85   |
| 25 | O2-V-O3 | 148.97            | 148.88   | 148.61   | 148.89   | 149.68       | 149.82   | 149.67   | 149.83   |
|    | O2-V-O4 | 102.25            | 101.44   | 102.64   | 102.10   | 102.24       | 102.26   | 102.38   | 101.91   |
|    | O3-V-O4 | 92.11             | 91.94    | 91.99    | 92.44    | 92.36        | 92.27    | 92.34    | 92.82    |
|    | O1-V-N1 | 96.09             | 95.94    | 95.67    | 95.82    | 95.80        | 95.90    | 95.68    | 95.72    |
| 30 | O2-V-N1 | 82.28             | 82.31    | 82.27    | 82.27    | 81.77        | 81.80    | 81.79    | 81.76    |
|    | O3-V-N1 | 74.91             | 74.88    | 74.73    | 74.86    | 75.56        | 75.58    | 75.46    | 75.55    |
|    | O4-V-N1 | 158.28            | 158.32   | 158.52   | 158.65   | 158.73       | 158.55   | 158.70   | 158.93   |
| 35 | O1-V-N3 | 176.80            | 176.73   | 176.65   | 176.90   | 176.57       | 176.50   | 176.42   | 176.80   |
|    | O2-V-N3 | 80.40             | 80.52    | 80.58    | 80.42    | 81.47        | 81.68    | 81.77    | 81.54    |
|    | O3-V-N3 | 77.62             | 77.42    | 77.26    | 77.62    | 77.54        | 77.42    | 77.31    | 77.68    |
|    | O4-V-N3 | 73.28             | 73.25    | 73.29    | 73.37    | 73.13        | 73.11    | 73.16    | 73.28    |
| 40 | N1-V-N3 | 86.77             | 86.92    | 87.14    | 86.99    | 87.02        | 86.85    | 86.98    | 86.93    |

**Table S6:** Vertical excitation energies ( $E_{\text{cal}}$ ), oscillator strengths ( $f_{\text{cal}}$ ), and type of excitations of the lowest three excited singlets obtained from TD-DFT calculations of **1-4**

| Complex               | State                   | $E_{\text{cal}}/\text{nm}$ | $f_{\text{cal}}$ | Excitation               |                         |
|-----------------------|-------------------------|----------------------------|------------------|--------------------------|-------------------------|
| <b>1</b>              | S <sub>1</sub>          | 642.77                     | 0.0033           | HOMO-2 → LUMO (0.16154)  |                         |
|                       |                         |                            |                  | HOMO-1 → LUMO (0.17784)  |                         |
|                       | S <sub>2</sub>          | 508.05                     | 0.0028           | HOMO-3 → LUMO (0.17631)  |                         |
|                       |                         |                            |                  | HOMO-2 → LUMO (0.60430)  |                         |
|                       |                         |                            |                  | HOMO → LUMO (-0.30393)   |                         |
|                       | S <sub>3</sub>          | 487.08                     | 0.2004           | HOMO-3 → LUMO (0.12808)  |                         |
|                       |                         |                            |                  | HOMO-1 → LUMO (0.67793)  |                         |
|                       | <b>2</b>                | S <sub>1</sub>             | 665.26           | 0.0038                   | HOMO-2 → LUMO (0.16154) |
|                       |                         |                            |                  |                          | HOMO-1 → LUMO (0.17784) |
| HOMO → LUMO (0.65819) |                         |                            |                  |                          |                         |
| S <sub>2</sub>        |                         | 511.35                     | 0.0024           | HOMO-3 → LUMO (-0.19657) |                         |
|                       |                         |                            |                  | HOMO-2 → LUMO (0.44163)  |                         |
|                       |                         |                            |                  | HOMO-1 → LUMO (0.45607)  |                         |
|                       |                         |                            |                  | HOMO → LUMO (-0.23424)   |                         |
| S <sub>3</sub>        |                         | 486.36                     | 0.2027           | HOMO-3 → LUMO (0.15100)  |                         |
|                       |                         |                            |                  | HOMO-2 → LUMO (-0.45876) |                         |
| <b>3</b>              | S <sub>1</sub>          | 709.80                     | 0.0017           | HOMO → LUMO (0.69400)    |                         |
|                       |                         |                            |                  | S <sub>2</sub>           | 527.55                  |
|                       | HOMO-1 → LUMO (0.65961) |                            |                  |                          |                         |
|                       | S <sub>3</sub>          | 485.80                     | 0.1898           | HOMO-3 → LUMO (-0.19267) |                         |
|                       |                         |                            |                  | HOMO-2 → LUMO (0.64869)  |                         |
|                       |                         |                            |                  | HOMO-1 → LUMO (-0.10117) |                         |
|                       | <b>4</b>                | S <sub>1</sub>             | 653.55           | 0.0037                   | HOMO-2 → LUMO (0.13330) |
|                       |                         |                            |                  |                          | HOMO-1 → LUMO (0.25045) |
|                       |                         |                            |                  |                          | HOMO → LUMO (0.63972)   |
| S <sub>2</sub>        |                         | 518.91                     | 0.0028           | HOMO-3 → LUMO (-0.12311) |                         |
|                       |                         |                            |                  | HOMO-2 → LUMO (0.30141)  |                         |
|                       |                         |                            |                  | HOMO-1 → LUMO (0.55649)  |                         |
|                       |                         |                            |                  | HOMO → LUMO (-0.28431)   |                         |
| S <sub>3</sub>        |                         | 489.47                     | 0.2111           | HOMO-3 → LUMO (-0.11321) |                         |
|                       |                         |                            |                  | HOMO-2 → LUMO (0.59391)  |                         |
|                       |                         |                            |                  | HOMO-1 → LUMO (-0.33682) |                         |

**Table S7:** Extent of DNA SC pUC19 (500ng) cleavage by 0.25 mM **1-4** complexes

| <b>Complex</b> | pUC form I<br>(% Super Coil) | pUC form II<br>(% Open Circular) | pUC form III<br>(% linear Coil) |
|----------------|------------------------------|----------------------------------|---------------------------------|
| <b>1</b>       | 58.3                         | 33.5                             | 0.0                             |
| <b>2</b>       | 56.8                         | 34.9                             | 0.0                             |
| <b>3</b>       | 52.6                         | 38.8                             | 0.0                             |
| <b>4</b>       | 53.1                         | 38.4                             | 0.0                             |

5

**Table S8:** Extent of DNA SC pUC19 (500 ng) cleavage by 0.5 mM ligands H<sub>3</sub>L<sup>1-4</sup>.

| Ligand                        | pUC form I<br>(% Super Coil) | pUC form II<br>(% Open Circular) | pUC form III<br>(% linear Coil) |
|-------------------------------|------------------------------|----------------------------------|---------------------------------|
| H <sub>3</sub> L <sup>1</sup> | 68.8                         | 24.2                             | 0.0                             |
| H <sub>3</sub> L <sup>2</sup> | 78.6                         | 16.1                             | 0.0                             |
| H <sub>3</sub> L <sup>3</sup> | 69.2                         | 19.3                             | 5.0                             |
| H <sub>3</sub> L <sup>4</sup> | 70.4                         | 22.9                             | 0.0                             |

10

15

20

25

**Table S9:** Different type of interactions between the CT-DNA and the each of the complexes obtained from

molecular docking study

| Complex  | No.of hydrogen bonds | Hydrogen bonds                                 |                          |             | D--H—A angle | No. of ionic interactions | $\pi$ - interactions                |                        |                  |
|----------|----------------------|------------------------------------------------|--------------------------|-------------|--------------|---------------------------|-------------------------------------|------------------------|------------------|
|          |                      | DNA End                                        | Complex End              | Distances Å |              |                           | DNA End                             | Complex End            | Bond Distances Å |
| <b>1</b> | 1                    | Chain A, O atom of phosphate of Thimin 8       | Free OH                  | 1.98        | 124.89       | 3                         | Chain B, O atom of phosphate of C21 | Phenyl ring            | 3.60             |
|          |                      |                                                |                          |             |              |                           | Chain B, H atom of Suger of T20     | O18                    | 1.88             |
|          |                      |                                                |                          |             |              |                           | Chain B, H atom of Suger of T20     | O18                    | 2.93             |
| <b>2</b> | 3                    | Chain A, H atom of NH <sub>2</sub> group of G4 | V=O                      | 2.10        | 135.3        | 2                         | Chain B, aromatic ring of C23       | Phenyl ring            | 5.70             |
|          |                      | Chain A, H atom of NH group of G4              | V=O                      | 1.72        | 144.4        |                           | Chain A, H atom of Suger of A5      | V=O                    | 2.91             |
|          |                      | Chain A, H atom of NH <sub>2</sub> group of G4 | O of V-O-aromatic moiety | 3.15        | 114.9        |                           |                                     |                        |                  |
| <b>3</b> | 3                    | Chain A, H atom of NH <sub>2</sub> group of G4 | V=O                      | 1.85        | 136.9        | 2                         | Chain A, H atom of Suger of A5      | V=O                    | 2.53             |
|          |                      | Chain A, H atom of NH group of G4              | V=O                      | 2.02        | 127.7        |                           | Chain A, H atom of Suger of A5      | V=O                    | 2.86             |
|          |                      | Chain A, H atom of NH <sub>2</sub> group of G4 | O of V-O-aromatic moiety | 2.63        | 113.5        |                           |                                     |                        |                  |
| <b>4</b> | 1                    | O of phosphate of T8 of Chain A                | Free OH                  | 2.17        | 148.55       | 3                         | Chain B, O of phosphate of C21      | Phenyl ring            | 3.18             |
|          |                      |                                                |                          |             |              |                           | Chain B,H of sugar of T20           | O of V-O-aromatic ring | 1.97             |
|          |                      |                                                |                          |             |              |                           | Chain B,H of sugar of T20           | O of V-O-aromatic ring | 2.67             |



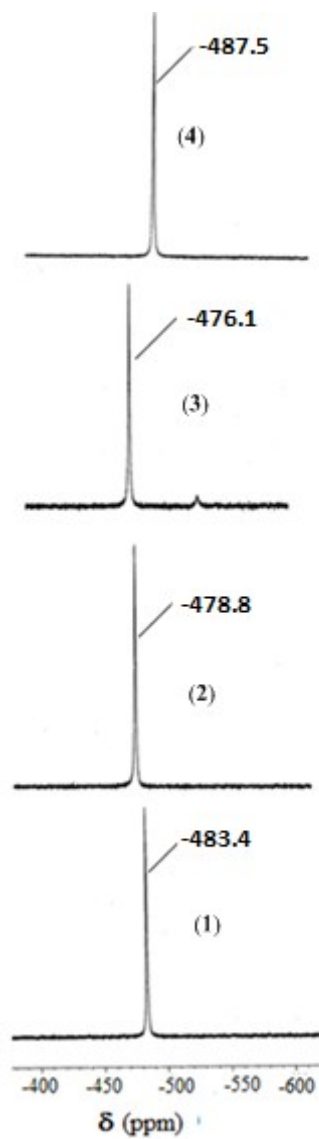

Fig. S1

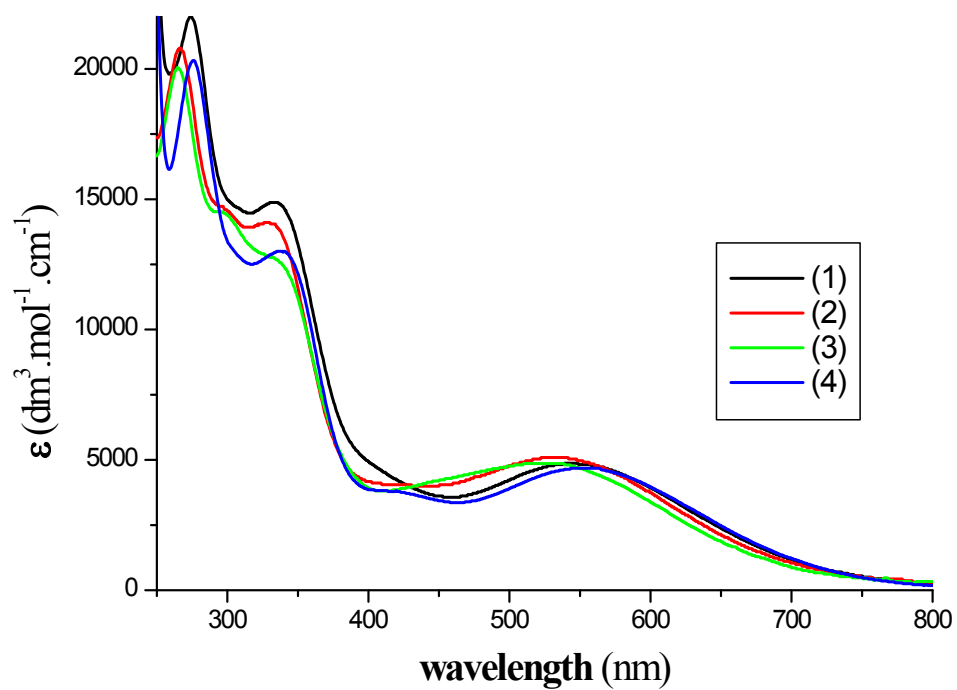

Fig. S2

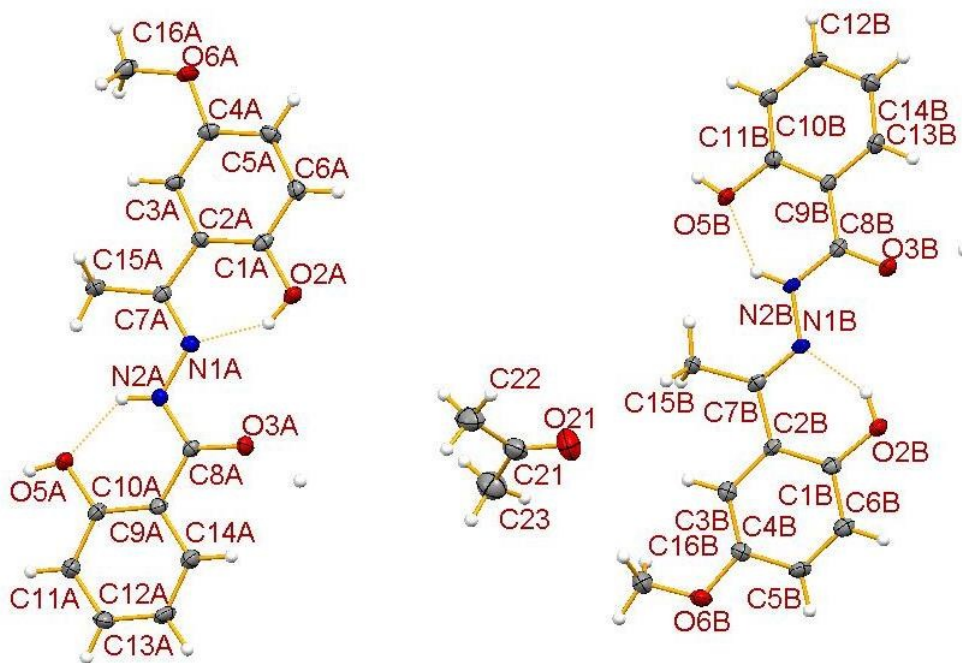

Fig. S3

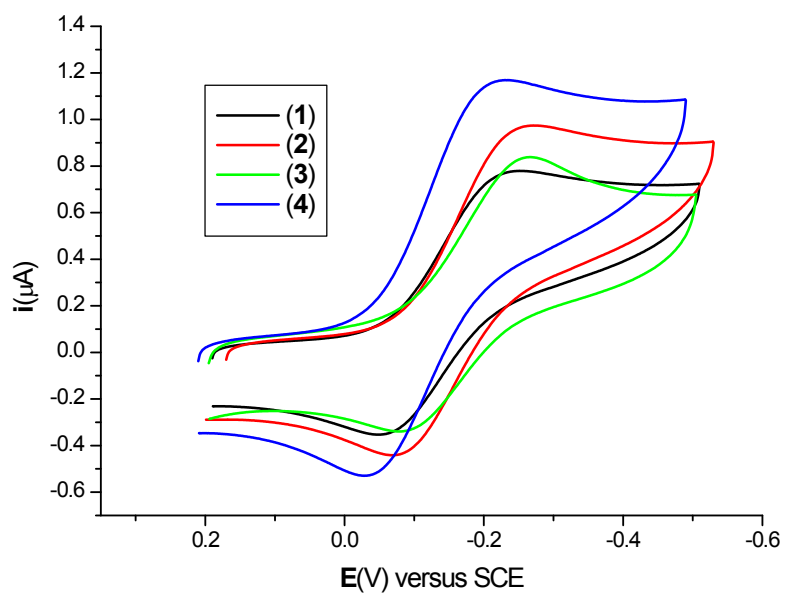

**Fig. S4**

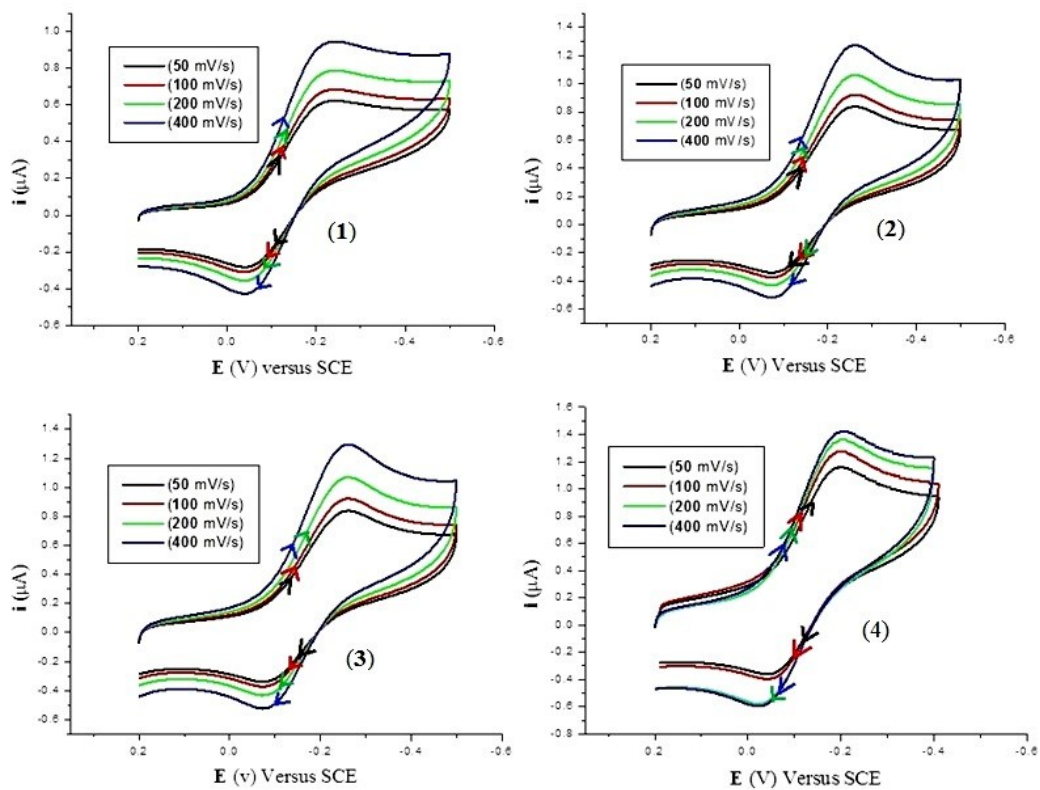

**Fig. S5**

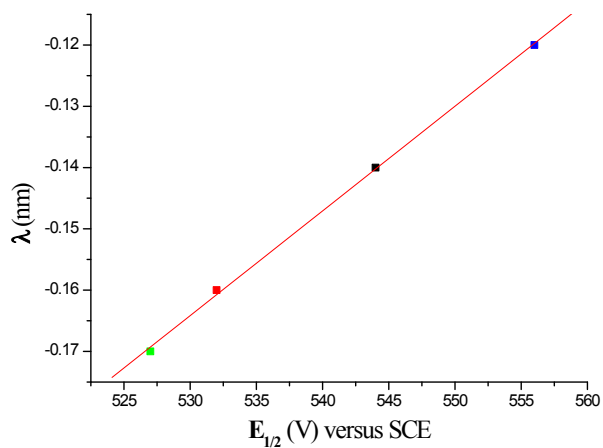

Fig. S6

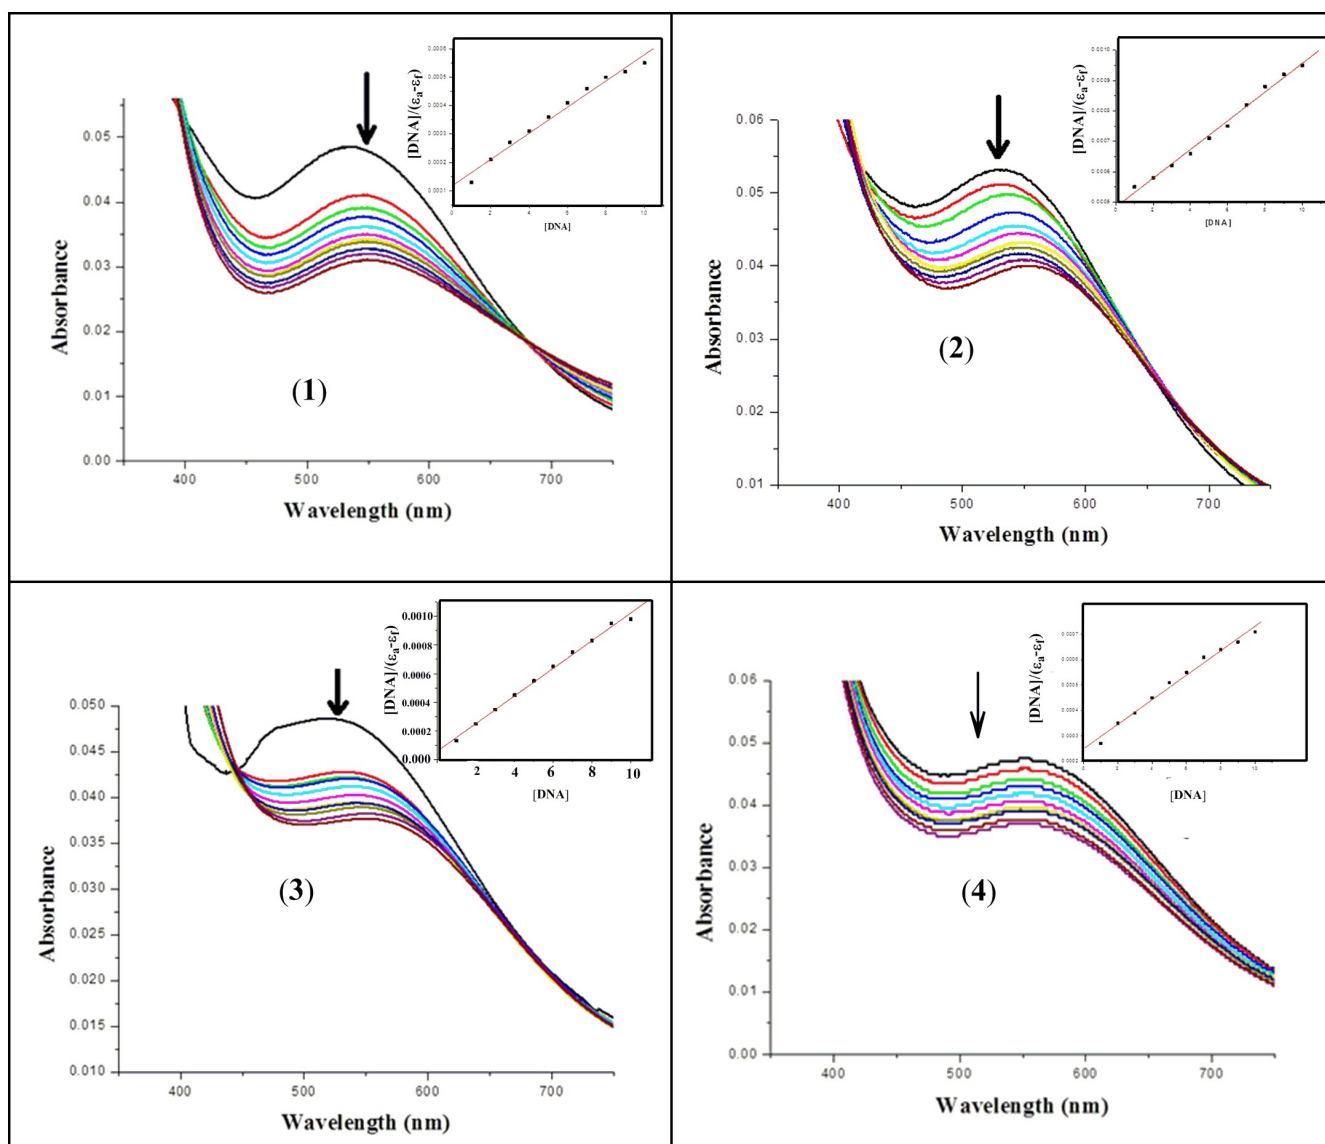

Fig. S7

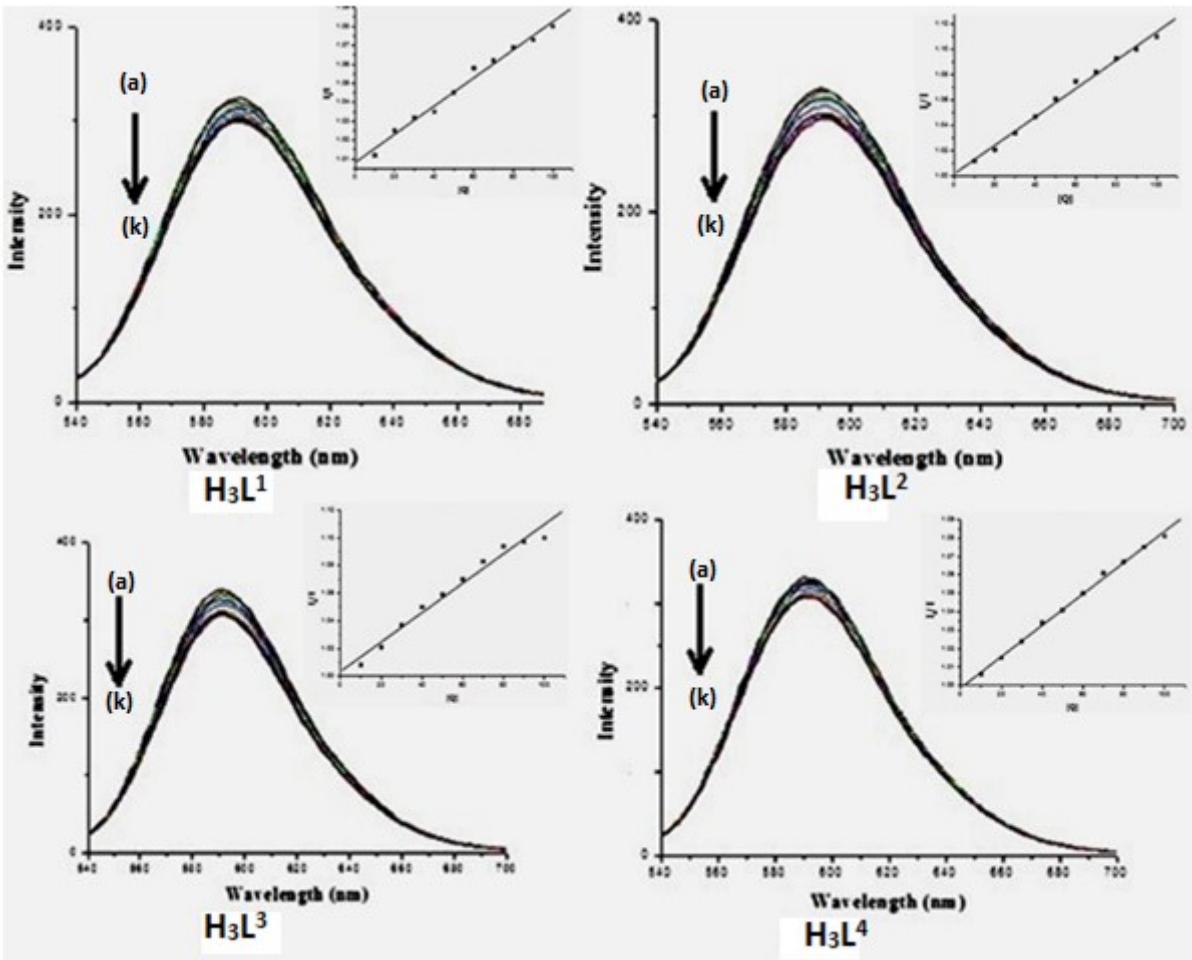

Fig. S8

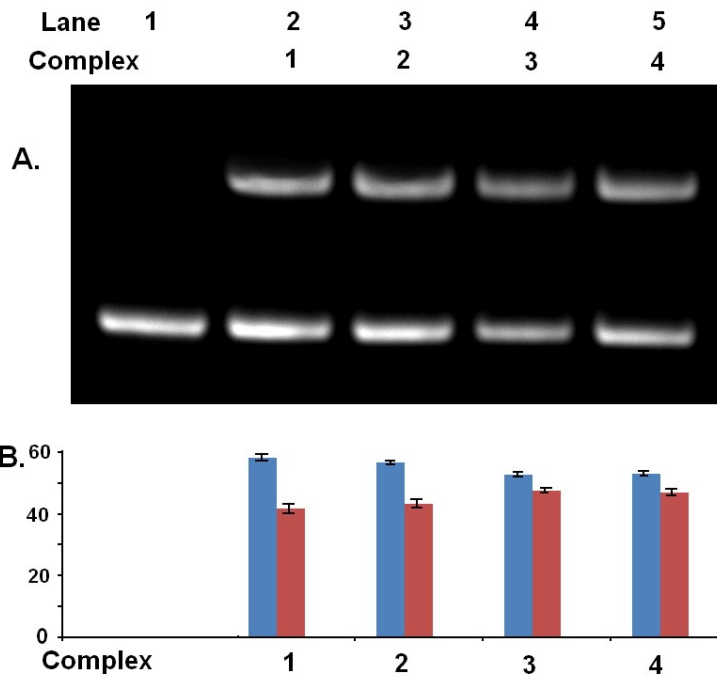

Fig. S9

|               |          |          |          |          |          |
|---------------|----------|----------|----------|----------|----------|
| <b>Lane</b>   | <b>1</b> | <b>2</b> | <b>3</b> | <b>4</b> | <b>5</b> |
| <b>Ligand</b> |          | $H_3L^1$ | $H_3L^2$ | $H_3L^3$ | $H_3L^4$ |

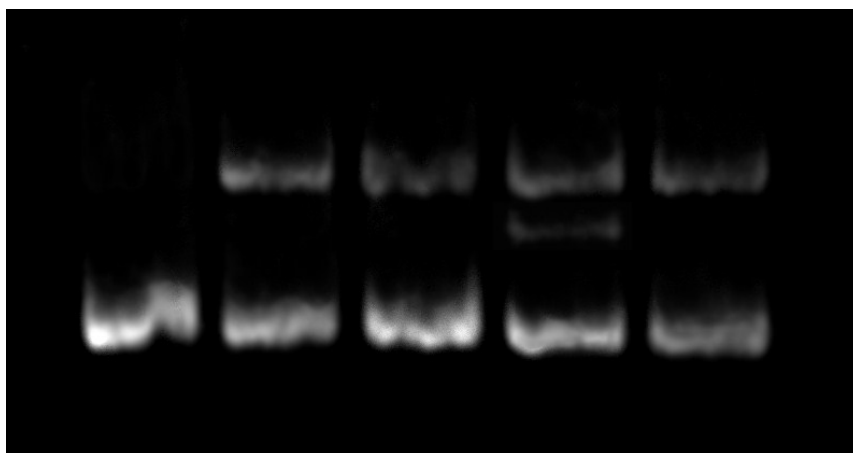

5

**Fig. S10**

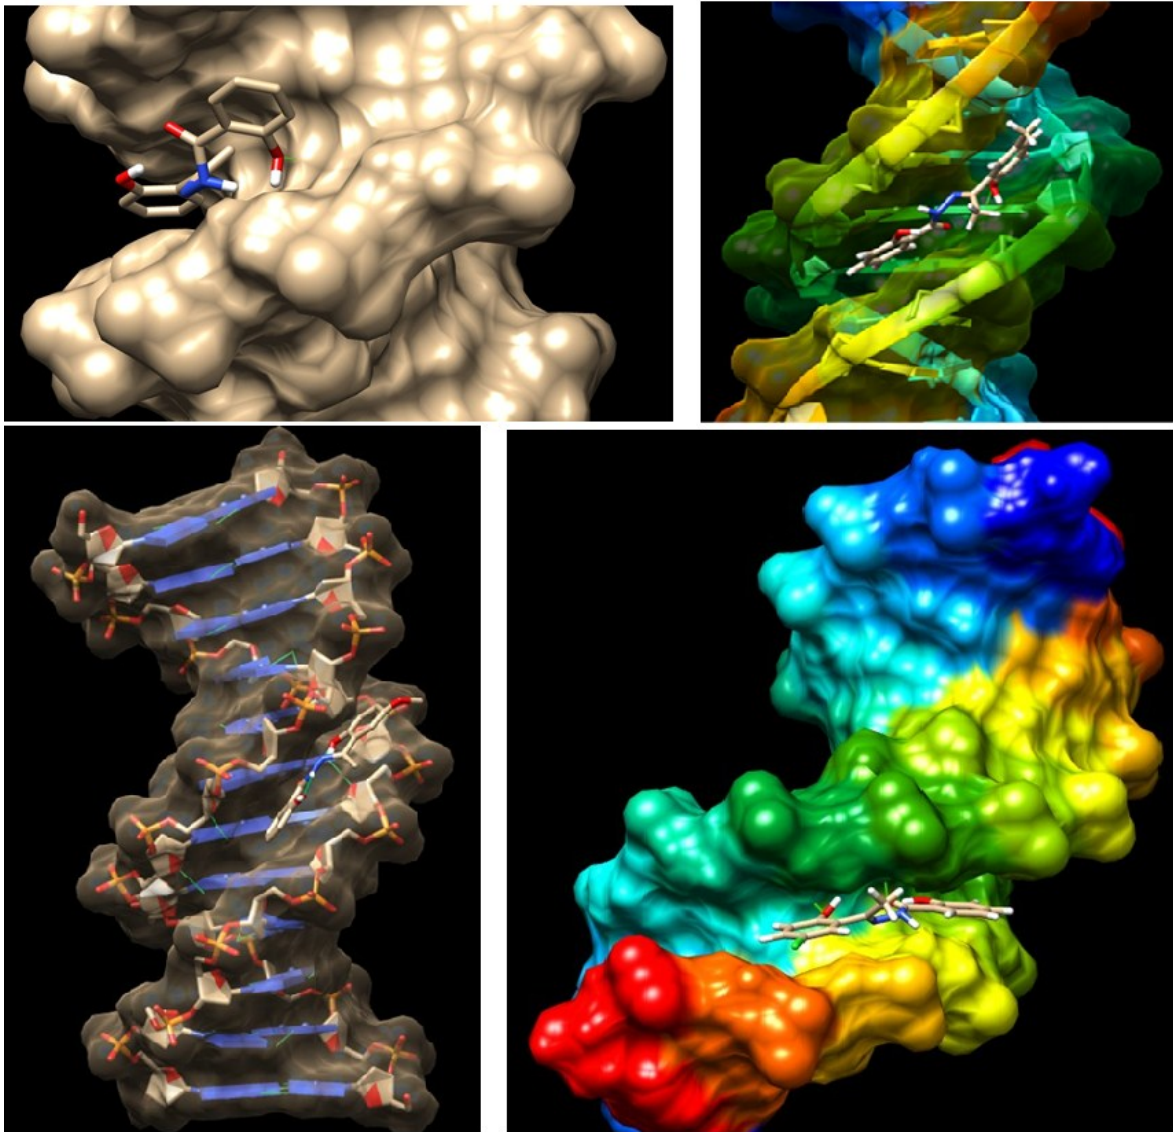

**Fig. S11**
